# Supplementary material for: STAT-3–independent production of IL-17 by mouse innate-like αβ T cells controls ocular infection
Source: PubMed Central journal article supplement — J Exp Med. 2018 Apr 2;215(4):1079–90. doi: 10.1084/jem.20170369 (PMC5881461; doi:10.1084/jem.20170369), 2018-04-02
Supplement: JEM_20170369_sm.pdf [file JEM_20170369_sm.pdf]

SUPPLEMENTAL MATERIAL

St. Leger et al., <https://doi.org/10.1084/jem.20170369>

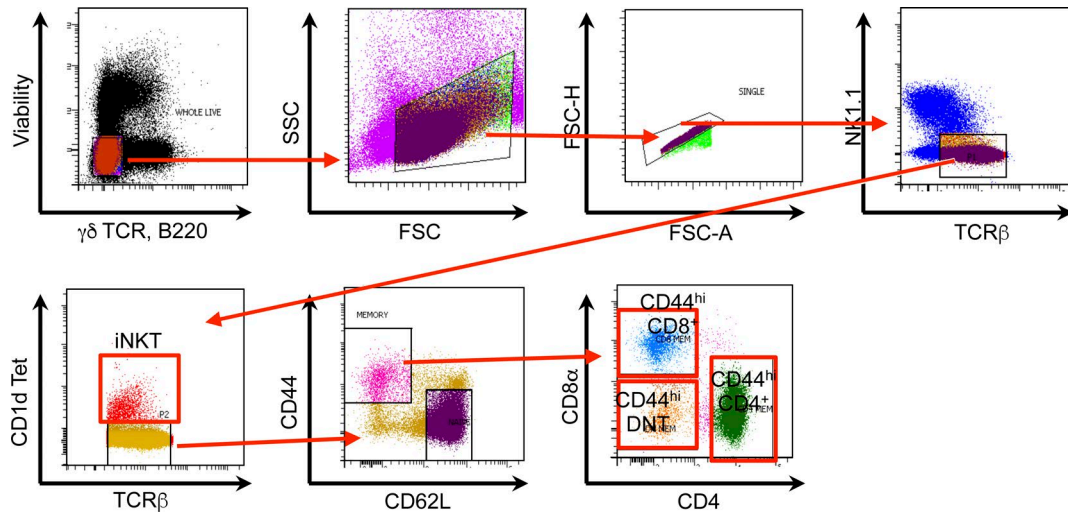

Figure S1. **Gating strategy for isolating CD44<sup>hi</sup> CD4<sup>+</sup>, CD44<sup>hi</sup> CD8<sup>+</sup>, CD44<sup>hi</sup> DNT, and iNKT cells.** Spleen and LN cells were initially sorted by negative selection for MHC II and B220 by MACS or isolated for T cells using T cell isolation columns from R&D Systems. After initial sorting, cells were stained with fluorescent antibodies against  $\gamma\delta$  TCR, B220, TCR $\beta$ , NK1.1, CD1d tetramer, CD62L, CD44, CD8, and CD4. Red boxes indicate populations of interest for the outlined studies.

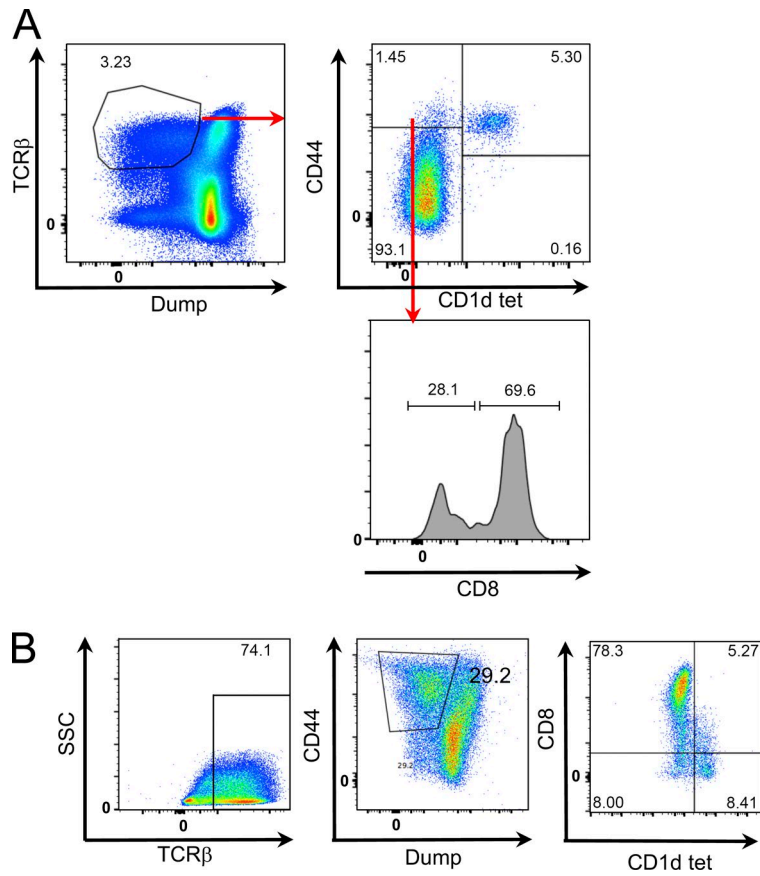

Figure S2. **Gating strategy for Fig. 5.** (A) Representative gating strategy for Fig. 5 A. Dump gate includes  $\gamma\delta$  TCR, B220, CD4, and CD62L. PLZF expression and IL-17 production was based off of the CD44<sup>hi</sup> CD8<sup>+</sup>, CD44<sup>hi</sup> DNT, or CD1d tet<sup>+</sup> (iNKT). (B) Representative gating strategy to identify IL-17–producing cells in Fig. 5 B. Dump gate includes CD62L, B220,  $\gamma\delta$ TCR, and CD4.
